# Supplementary material for: Paper supported long-term 3D liver co-culture model for the assessment of hepatotoxic drugs
Source: Royal Society of Chemistry journal article supplement (doi:10.1039/c7tx00209b), 2017-09-27
Supplement: c7tx00209b1.pdf [file c7tx00209b1.pdf]

## Supplementary Information

### **Paper supported long-term 3D liver co-culture model for the assessment of hepatotoxic drugs**

Yaqing Wang<sup>a,b</sup>, Wentao Su<sup>a</sup>, Li Wang<sup>a</sup>, Lei Jiang<sup>a</sup>, Yang Liu<sup>a,b</sup>, Lijian Hui<sup>b,c</sup> and  
Jianhua Qin<sup>a,b\*</sup>

<sup>a</sup> Division of Biotechnology, Dalian Institute of Chemical Physics, Chinese Academy of Sciences, Dalian 116023, China.

<sup>b</sup> University of Chinese Academy of Sciences, Beijing 100049, China.

<sup>c</sup> Institute of Biochemistry and Cell Biology, Shanghai Institutes for Biological Sciences, CAS, Shanghai 200031, China.

\*Correspondence: Jianhua Qin, Dalian Institute of Chemical Physics, Chinese Academy of Sciences, 457 Zhongshan Road, Dalian 116023, China. E-mail: jhqin@dicp.ac.cn. Fax: 86-411-84379059

The authors have no conflicts of interest to declare.

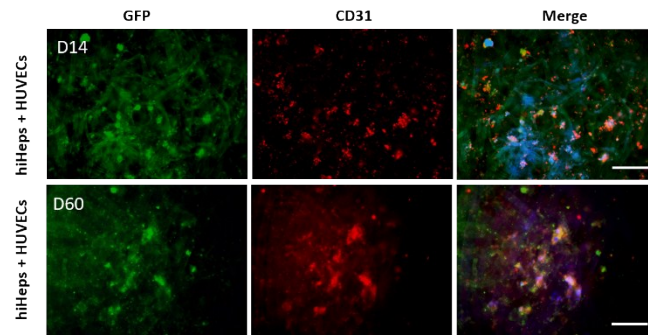

**Figure S1.** Identification of hiHeps and HUVECs during the course of co-culture on paper scaffold. Staining of a HUVECs marker (CD31) in liver co-cultures on paper scaffold at day 14 and day 60 by immunofluorescence assays. The green color represents the expression of GFP proteins in hiHeps. Scale bar, 200  $\mu\text{m}$ .
